# Supplementary material for: Mobile Colistin Resistance Genetic Determinants of Non-typhoid <em>Salmonella enterica</em> Isolates from Russia
Source: Preprints.org preprint supplement (doi:10.20944/preprints202111.0176.v1), 2021-11-09
Supplement: Supplementary file 3 [file supplementary]

## Sheet: S1
			Table S1 Detailed information of IncX4, IncI2 plasmids used for comparative analysis
			Plasmid name	Plasmid type	Species or Serotype	Year	Source	Geographic region	NCBI accesstion	Reference
			pCSZ4	IncX4	E. coli	2012	Pork	China	KX711706	DOI:10.1038/s41598-017-00095-x
			pS8250-2	IncX4	S. Enteritidis	2019	Chicken	Russia:Yakutiya	CP060524.1	In this study
			pS8245-3	IncX4	S. Enteritidis	2019	Human	Russia: Elban	CP080094.1	In this study
			pCFSA231	IncX4	S. Derby	2016	Dumpling (pork stuffing)	China: Hubei	CP033349.2	https://doi.org/10.3389/fmicb.2021.636284
			pNG14043	IncX4	S. Typhimurium	2016	Human	Taiwan	KY120364.1	https://doi.org/10.1002/adbi.201900219
			pTB602	IncX4	Salmonella	2018	Human	China:Zhejiang	CP034833.1	https://doi.org/10.1002/adbi.201900219
			pN17-0346	IncX4	Salmonella 4,5,12:i:-	2017	Human	Switzerland	CP031291.1	Letter to editor
			SA323	IncX4	Salmonella	2015	Chicken	Brazil: Sao Paulo	NIWS00000000	https://doi.org/10.1016/j.diagmicrobio.2018.10.016
			pERS1834533	IncX4	Monophasic Typhimurium 4,5:i:-	2012	pork	Belgium	ERS1834533	https://www.liebertpub.com/doi/full/10.1089/fpd.2017.2329
			pS7627-2	IncI2	S. Bovismorbificans	2018	Human	Russia:Irkutsk	CP060519	In this study
			pCESA664-3	IncI2	S. Indiana		Chicken	China	CP033355	https://www.mdpi.com/2076-2607/9/2/398/htm
			pCESA244-2	IncI2	S. Typhimurium		Pork	China	CP033254	https://www.mdpi.com/2076-2607/9/2/398/htm
			pK18JST013	IncI2	S. Typhimurium		Pig	Korea	CP065423	https://www.mdpi.com/2076-2607/9/2/398/htm
			pHSSH23-MCR1	IncI2	S. Enteritidis	2012	Human	China	KX856068.1	https://journals.asm.org/doi/full/10.1128/AAC.02471-16#B19
			pD4_mcr-1	IncI2	Salmonella	2012	Human	China	MH522409.1	https://doi.org/10.1016/j.foodcont.2021.108032
			pD4(R8)4	IncI2	Salmonella	experiment	Human	China	annotated manually	https://doi.org/10.1016/j.foodcont.2021.108032
			pD4(EC)1	IncI2	Salmonella	experiment	Human	China	annotated manually	https://doi.org/10.1016/j.foodcont.2021.108032
			pHNSHP45	IncI2	E. coli		Pig	China	KP347127	https://www.mdpi.com/2076-2607/9/2/398/htm
			pEC019	IncI2	E. coli		Chicken	Korea	KY471145	https://www.mdpi.com/2076-2607/9/2/398/htm
			рЕC006	IncI2	E. coli		Chicken	Korea	KY471144	https://www.mdpi.com/2076-2607/9/2/398/htm
			pCREC-527-4	IncI2	E. coli		Human	Korea	KY657476	https://www.mdpi.com/2076-2607/9/2/398/htm
			pUSU-ECO-12704	IncI2	E. coli		Human	Korea	KY657478	https://www.mdpi.com/2076-2607/9/2/398/htm
			pmcr1_IncI2	IncI2	E. coli	2016	Human	China	KU761326	https://doi.org/10.1038/srep38511
